# Supplementary material for: Dynamics and magnetic resonance properties of Sc3C2@C80 and its monoanion
Source: Royal Society of Chemistry journal article supplement (doi:10.1039/b811032h), 2008-01-01
Supplement: b811032h.pdf [file b811032h.pdf]

## Dynamics, bonding and magnetic resonance properties of $\text{Sc}_3\text{C}_2@C_{80}$ and its monoanion

Stefan Taubert <sup>a,b</sup>, Michal Straka<sup>a,c</sup>, Teemu O. Pennanen<sup>a</sup>, Dage Sundholm<sup>a</sup>, and Juha Vaara<sup>a</sup>.

<sup>a</sup>*Department of Chemistry, P.O. Box 55 (A.I. Virtasen aukio 1), FIN-00014 University of Helsinki, Finland*

<sup>c</sup>*Institute of Org. Chemistry and Biochemistry, Academy of Sciences of the Czech Republic, Flemingovo n. 2., 16610 Prague, Czech Republic*

E-mail: <sup>b</sup> stefan.taubert@helsinki.fi, <sup>c</sup> straka@uochb.cas.cz

### Table of Contents

| Topic                                                                                                                                                   | Page      |
|---------------------------------------------------------------------------------------------------------------------------------------------------------|-----------|
| Figure S1. Total displacement of the six-membered ring nearest to Sc1                                                                                   | ... S2    |
| Figure S2. Correlated radial displacement of Sc1 and six-membered ring                                                                                  | ... S3    |
| Figures S4-S5. <sup>13</sup> C NMR spectra of $\text{Sc}_3\text{C}_2@C_{80}$ and $\text{Sc}_2\text{C}_2@C_{84}$                                         | ... S4-S5 |
| Table S1. Relative molecular energies in $\text{kJ mol}^{-1}$ of the investigated structures and spin states of the $\text{Sc}_3\text{C}_{82}$ molecule | ... S6    |
| Table S2 The basis set dependence of the relative molecular energies of Investigated isomers of $\text{Sc}_3\text{C}_2@C_{80}$                          | ... S6    |
| Table S3. <sup>13</sup> C NMR chemical shifts for cage carbon atoms in $[\text{Sc}_3\text{C}_2@C_{80}]^-$                                               | ... S6    |
| Table S4. <sup>45</sup> Sc nuclear magnetic shieldings                                                                                                  | S7        |
| Table S5. Calculated principal and isotropic <i>g</i> values for $\text{Sc}_3\text{C}_2@C_{80}$ .                                                       | ... S7    |
| Cartesian coordinates of the optimized structures of                                                                                                    | ...       |
| $\text{Sc}_3\text{C}_2@C_{80}$ , isomer <b>1a</b>                                                                                                       | ... S8    |
| $\text{Sc}_3\text{C}_2@C_{80}$ , isomer <b>2a</b>                                                                                                       | ... S9    |
| $\text{Sc}_3\text{C}_2@C_{80}$ , isomer <b>1a</b> anion                                                                                                 | ... S11   |
| $\text{Sc}_3\text{C}_2@C_{80}$ , isomer <b>2a</b> anion                                                                                                 | ... S12   |
| $\text{Sc}_3\text{C}_2@C_{80}$ , isomer <b>1a</b> <sub>TS</sub>                                                                                         | ... S14   |
| $\text{Sc}_3@C_{82}$                                                                                                                                    | ... S15   |
| $\text{Sc}_3\text{C}_2@C_{80}$ , distorted <i>C</i> <sub>1</sub> -symmetric isomer <b>1a</b>                                                            | ... S17   |
| $\text{Sc}_3\text{C}_2@C_{80}$ , distorted <i>C</i> <sub>1</sub> -symmetric isomer <b>2a</b>                                                            | ... S18   |
| $\text{Sc}_3\text{C}_2@C_{80}$ , distorted <i>C</i> <sub>1</sub> -symmetric isomer <b>1a</b> anion                                                      | ... S20   |
| $\text{Sc}_3\text{C}_2@C_{80}$ , distorted <i>C</i> <sub>1</sub> -symmetric isomer <b>2a</b> anion                                                      | ... S22   |
| $\text{Sc}_2\text{C}_2@C_{84}$                                                                                                                          | ... S23   |
| $\text{Sc}_2\text{C}_2@C_{84}$ , anion                                                                                                                  | ... S25   |

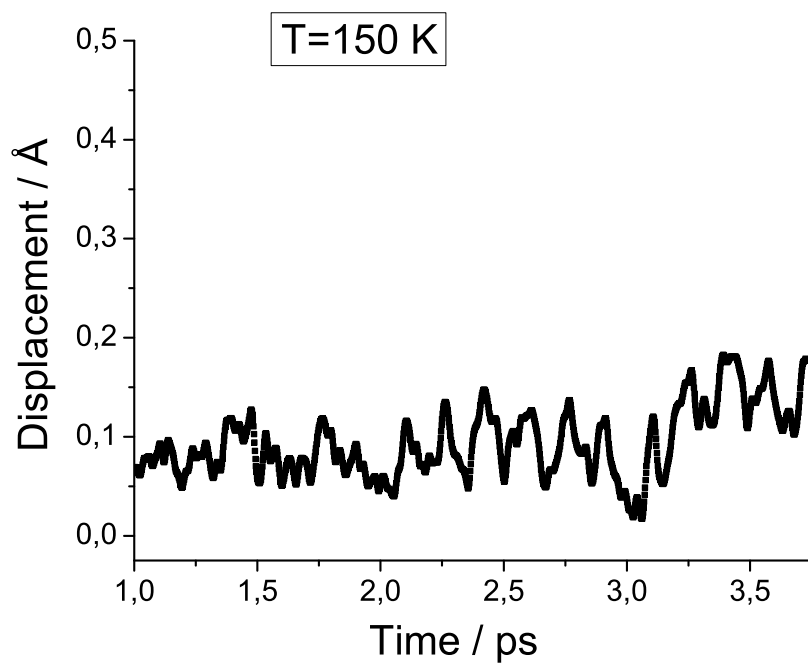

(a)

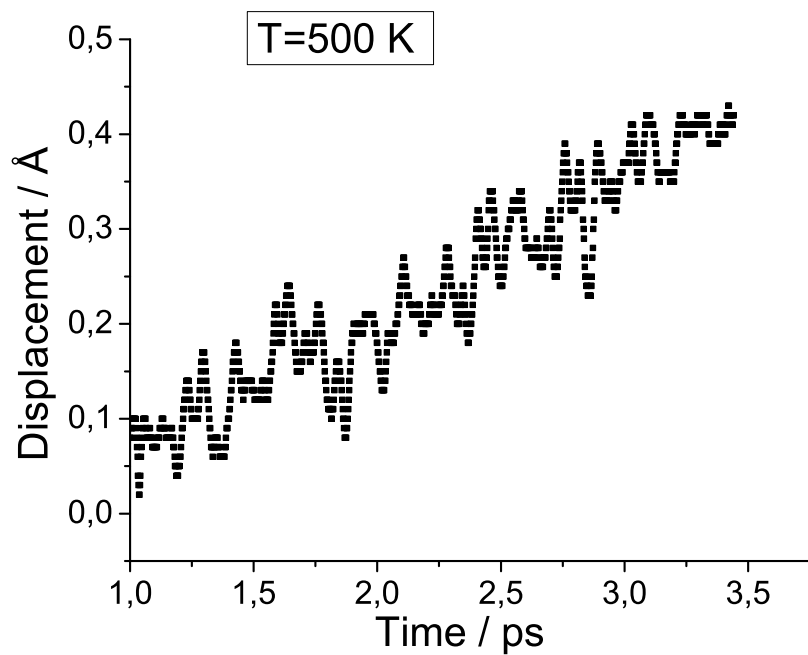

(b)

Figure S1: Total displacement from the original positions in the static 1a structure (in Å) of the center of mass of the six-membered ring closest to Sc1.

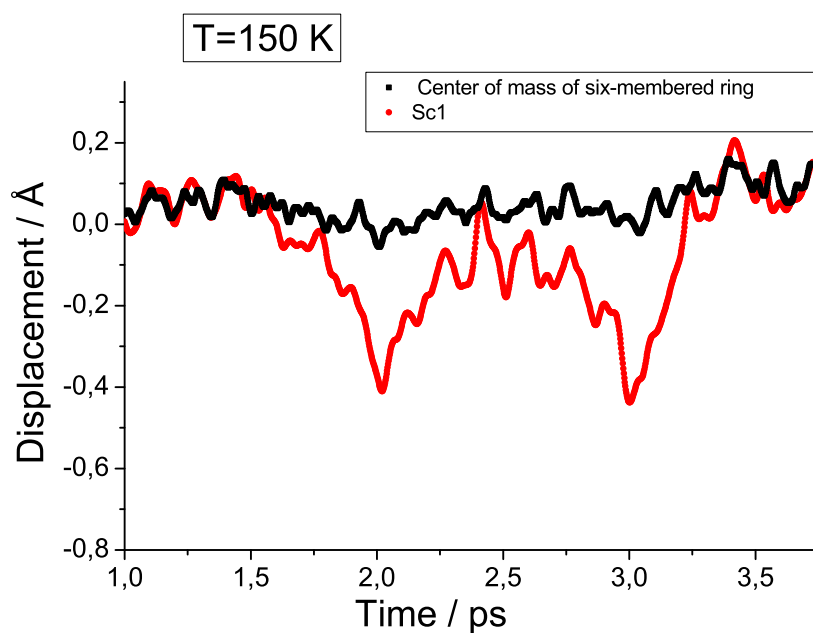

(a)

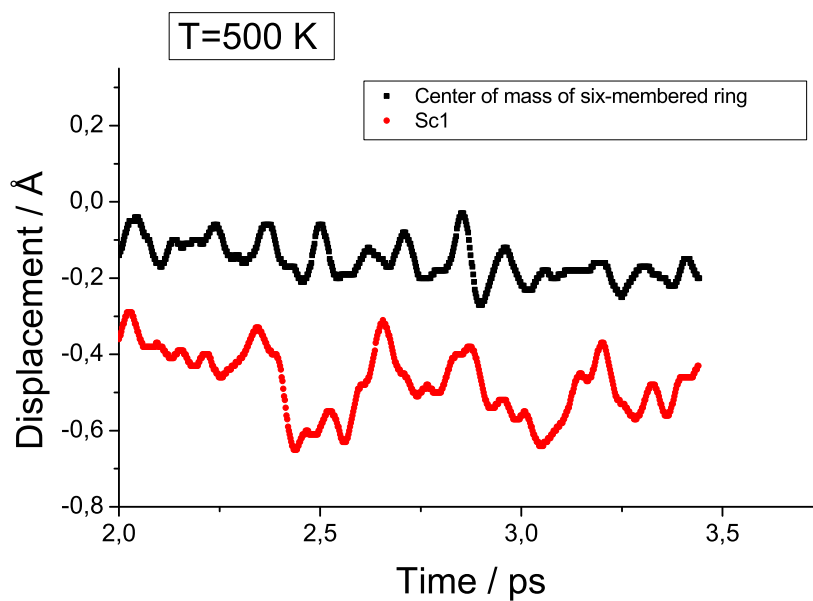

(b)

Figure S2: Displacement from the original positions in the static 1a structure (in Å) of the center of mass of the six-membered ring closest to Sc1, as well as of Sc1. The motion is directed towards the cage interior (negative direction on the y-axis). This plot illustrates the breathing-like dynamics of the cage, and it indicates a coupling between the Sc atoms and the cage. Although the amplitude of the motion of the scandium atom is larger than that of the cage, the phase is qualitatively the same throughout the trajectory.

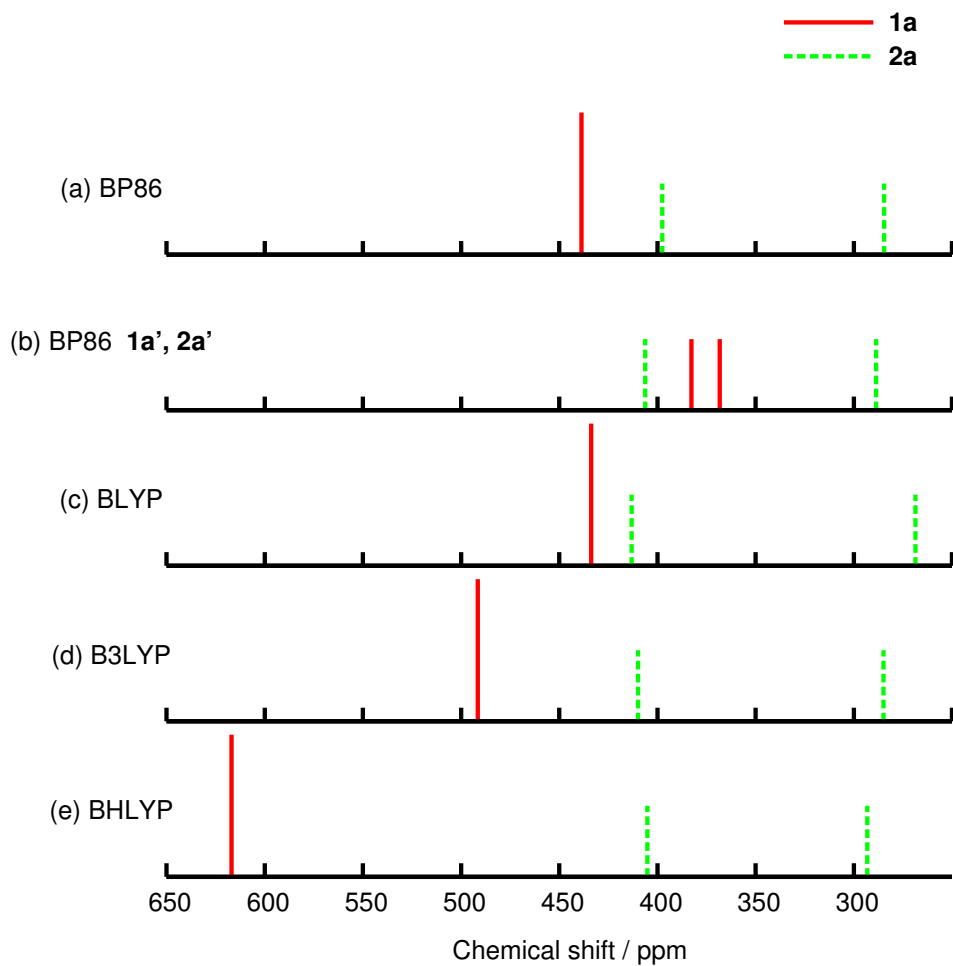

Figure S3: Calculated  $^{13}\text{C}$  NMR spectrum of the endohedral carbon atoms in the  $[\text{Sc}_3\text{C}_2@C_{80}]^-$  anion obtained with the indicated functionals. The def2-TZVP basis set is used. The x-scale is the chemical shift (in ppm) relative to TMS.

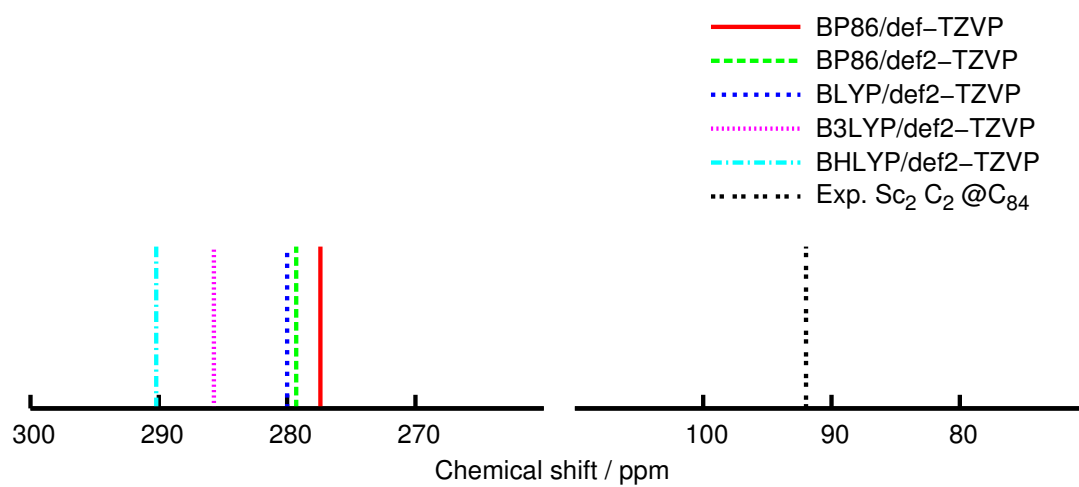

Figure S4: Calculated  $^{13}\text{C}$  NMR spectrum of the endohedral carbon atoms in the  $\text{Sc}_2\text{C}_2@C_{84}$  molecule obtained at the given computational levels. The x-scale is the chemical shift (in ppm) relative to TMS.

Table S1: Relative molecular energies in  $\text{kJ mol}^{-1}$  of the investigated structures and spin states of the  $\text{Sc}_3\text{C}_{82}$  molecule. The energies are given relative to **1a** and all structures are optimized at the BP86/def2-TZVP.

| Molecule                             | Isomer                 | Singlet (anion) | Doublet    | Quartet | Sextet |
|--------------------------------------|------------------------|-----------------|------------|---------|--------|
| $\text{Sc}_3\text{C}_{82}^a$         | $C_{3v}$               |                 | 147.2      | 142.3   | 204.5  |
| $\text{Sc}_3\text{C}_2\text{C}_{80}$ | <b>1a</b>              | -301.1          | <b>0.0</b> | 127.2   | 290.4  |
|                                      | <b>2a</b>              | -316.9          | 3.2        | 185.6   | 329.8  |
|                                      | <b>1a<sub>TS</sub></b> |                 | 14.1       |         |        |
|                                      | <b>1a'</b>             | -303.3          | 0.1        |         |        |
|                                      | <b>2a'</b>             | -320.6          | 0.9        |         |        |

<sup>a</sup> Structure ( $C_{3v}$ ) optimized for the quartet state at the RI-BP86/def2-TZVP level.

Table S2: The energies in  $\text{kJ mol}^{-1}$  of the different isomers of the doublet  $\text{Sc}_3\text{C}_2\text{C}_{80}$  with different basis sets employed together with the BP86 DFT functional. The energies are given relative to **1a** and all structures are optimized at the BP86/def2-SVP level.

| Single-point                    | <b>1a</b> | <b>2a</b> | <b>1a'</b> | <b>2a'</b> |
|---------------------------------|-----------|-----------|------------|------------|
| def2-SVP                        | 0.0       | -4.2      | -5.0       | -0.1       |
| ZPVE <sup>a</sup>               | 0.00      | 0.36      | 0.67       | -2.62      |
| def2-SVP/def2-TZVP <sup>b</sup> | 0.0       | -2.3      | —          | —          |
| def2-TZVP                       | 0.0       | 1.2       | -10.5      | -9.7       |

<sup>a</sup> Zero-point vibrational corrections have been calculated at the RI-BP86/def2-SVP level. The corrections are given relative to the ZPVE of **1a**.

<sup>b</sup> With the def2-TZVP basis set for the endohedral atoms and the def2-SVP basis set for the cage atoms.

Table S3: Calculated<sup>a</sup>  $^{13}\text{C}$  NMR chemical shifts (in ppm with respect to TMS<sup>b</sup>) for cage carbon atoms in  $[\text{Sc}_3\text{C}_2\text{C}_{80}]^-$ .

| Level             | Isomer <b>1a</b> |        | Isomer <b>2a</b> |        |
|-------------------|------------------|--------|------------------|--------|
|                   | Peak 1           | Peak 2 | Peak 1           | Peak 2 |
| BP86              | 149.4            | 138.2  | 151.1            | 141.4  |
| BP86 <sup>c</sup> | 145.6            | 146.2  | 149.9            | 140.1  |
| BLYP              | 150.3            | 139.1  | 151.0            | 141.4  |
| B3LYP             | 153.3            | 144.2  | 154.6            | 146.3  |
| BHLYP             | 156.4            | 150.4  | 157.7            | 151.2  |
| Exp. <sup>d</sup> | 145.6            | 138.9  |                  |        |

<sup>a</sup> Calculated with the specified functional and the def2-TZVP basis set. The shifts are averaged to correspond to the  $I_h$  cage.

<sup>b</sup> The  $^{13}\text{C}$  shielding constants of TMS are 182.30 ppm (BP86); 178.48 ppm (BLYP); 181.84 (B3LYP); 186.00 (BHLYP). The basis set is def2-TZVP.

<sup>c</sup> Isomers **1a'** and **2a'** at the lower  $C_1$  symmetry.

<sup>d</sup> Ref. 7. The isomers are experimentally indistinguishable.

Table S4: Calculated  $^{45}\text{Sc}$  NMR chemical shielding constants for both the closed-shell anion and the open-shell neutral form of isomers **1a** and **2a**

| Structure              | Atom | NMR <sup>a</sup> | pNMR <sup>b</sup> |
|------------------------|------|------------------|-------------------|
| <b>1a</b>              | Sc1  | 523.5            | 887               |
|                        | Sc2  | 502.9            | 1688              |
|                        | Sc3  | 502.9            | 1686              |
| <b>2a</b>              | Sc1  | 414.1            | 292               |
|                        | Sc2  | 300.2            | 1143              |
|                        | Sc3  | 300.2            | 1139              |
| <b>1a<sub>TS</sub></b> | Sc1  | 420.0            | 929               |
|                        | Sc2  | 413.2            | 1490              |
|                        | Sc3  | 413.4            | 1473              |
| <b>1a'</b>             | Sc1  | 467.5            | —                 |
|                        | Sc2  | 540.5            | —                 |
|                        | Sc3  | 533.4            | —                 |
| <b>2a'</b>             | Sc1  | 422.9            | —                 |
|                        | Sc2  | 310.2            | —                 |
|                        | Sc3  | 291.9            | —                 |

<sup>a</sup> At the RI-BP86/def2-TZVP level.

<sup>b</sup> At the BP86 level with EPR-II basis on C and (15s11p6d)/[9s7p4d] basis on Sc. The value includes the contribution from SO-coupling. Note that no scalar relativistic effects are taken into account.

Table S5: Calculated<sup>a</sup> principal and isotropic  $g$  values for  $\text{Sc}_3\text{C}_2@C_{80}$ .

| Structure                                        | $g_{\text{iso}}$ | $g_{11}$ | $g_{22}$ | $g_{33}$ |
|--------------------------------------------------|------------------|----------|----------|----------|
| <b>1a</b>                                        | 1.99923          | 1.99567  | 1.99976  | 2.00226  |
| <b>2a</b>                                        | 1.99459          | 1.99283  | 1.99475  | 1.99619  |
| <b>1a<sub>TS</sub></b>                           | 1.99845          | 1.99668  | 1.99793  | 2.00075  |
| Exp. <sup>b</sup> $\text{Sc}_3@C_{82}$           | 1.9987           |          |          |          |
| Exp. <sup>c</sup> $\text{Sc}_3\text{C}_2@C_{80}$ | 1.99835          |          |          |          |

<sup>a</sup> At the BP86 level with EPR-II basis on C and (15s11p6d)/[9s7p4d] basis on Sc.

<sup>b</sup> Ref. 6 of the article.

<sup>c</sup> Ref. 4 of the article.

Cartesian coordinates for the neutral 1a isomer of Sc<sub>3</sub>C<sub>2</sub>@C<sub>80</sub> (in Å).

85

Energy = -5408.521373082 Hartree

|   |            |            |            |
|---|------------|------------|------------|
| C | 4.1577582  | -0.1385263 | -0.0236560 |
| C | 4.0444752  | 0.5839164  | -1.2890400 |
| C | 3.5121084  | -0.0902163 | -2.5000322 |
| C | 3.0751730  | -1.4923077 | -2.4290608 |
| C | 3.2941366  | -2.2065454 | -1.1939236 |
| C | 3.8246127  | -1.5380683 | -0.0187233 |
| C | 3.4412531  | 1.9147387  | -1.2317009 |
| C | 3.1404234  | 2.6217834  | -0.0028086 |
| C | 3.4295175  | 1.9448404  | 1.2209549  |
| C | 3.8889925  | 0.5732732  | 1.2005223  |
| C | 3.2688549  | -2.1904100 | 1.1474666  |
| C | 2.9931575  | -1.4591938 | 2.3382523  |
| C | 3.3411633  | -0.0813519 | 2.3590227  |
| C | 2.4064774  | -3.2541045 | -0.7370202 |
| C | 2.4005937  | -3.2420207 | 0.6977589  |
| C | 2.5855703  | 0.8561051  | -3.1244582 |
| C | 2.5811759  | 2.0844704  | -2.3681054 |
| C | 2.6078463  | 2.1285107  | 2.3776496  |
| C | 2.5417259  | 0.8719065  | 3.0966378  |
| C | 1.8835132  | -1.8702817 | -3.1380144 |
| C | 1.0692503  | -0.9186612 | -3.8661236 |
| C | 1.3784330  | 0.4677918  | -3.8261685 |
| C | 0.2885575  | 1.3898548  | -3.8700934 |
| C | 0.3232969  | 2.6307499  | -3.1408830 |
| C | 1.4576705  | 2.9885595  | -2.3538305 |
| C | 1.2431109  | 3.7511893  | -1.1749167 |
| C | 2.0721475  | 3.5592708  | -0.0120360 |
| C | 1.2452896  | 3.7470444  | 1.1553506  |
| C | 1.4773257  | 2.9949511  | 2.3384465  |
| C | 0.3370829  | 2.6043842  | 3.1253617  |
| C | 0.2972182  | 1.4120585  | 3.9529598  |
| C | 1.4207952  | 0.4860729  | 3.9168123  |
| C | 1.0989938  | -0.9318780 | 3.9539811  |
| C | 1.8611567  | -1.8529228 | 3.1265161  |
| C | 0.9860775  | -2.8871287 | 2.6542148  |
| C | 1.2256067  | -3.5933949 | 1.4306318  |
| C | 1.0062532  | -2.9325515 | -2.6945566 |
| C | 1.2320745  | -3.6195487 | -1.4664550 |
| C | 0.0911438  | -4.0634778 | -0.7327061 |
| C | 0.0898123  | -4.0463774 | 0.7064847  |
| C | -4.1577582 | 0.1385263  | -0.0236560 |
| C | -3.8889925 | -0.5732732 | 1.2005223  |
| C | -3.3411633 | 0.0813519  | 2.3590227  |
| C | -2.9931575 | 1.4591938  | 2.3382523  |
| C | -3.2688549 | 2.1904100  | 1.1474666  |
| C | -3.8246127 | 1.5380683  | -0.0187233 |
| C | -3.4295175 | -1.9448404 | 1.2209549  |
| C | -3.1404234 | -2.6217834 | -0.0028086 |
| C | -3.4412531 | -1.9147387 | -1.2317009 |
| C | -4.0444752 | -0.5839164 | -1.2890400 |
| C | -3.2941366 | 2.2065454  | -1.1939236 |
| C | -3.0751730 | 1.4923077  | -2.4290608 |
| C | -3.5121084 | 0.0902163  | -2.5000322 |
| C | -2.4005937 | 3.2420207  | 0.6977589  |
| C | -2.4064774 | 3.2541045  | -0.7370202 |



|    |            |            |            |
|----|------------|------------|------------|
| C  | -2.5417259 | -0.8719065 | 3.0966378  |
| C  | -2.6078463 | -2.1285107 | 2.3776496  |
| C  | -2.5811759 | -2.0844704 | -2.3681054 |
| C  | -2.5855703 | -0.8561051 | -3.1244582 |
| C  | -1.8611567 | 1.8529228  | 3.1265161  |
| C  | -1.0989938 | 0.9318780  | 3.9539811  |
| C  | -1.4207952 | -0.4860729 | 3.9168123  |
| C  | -0.2972182 | -1.4120585 | 3.9529598  |
| C  | -0.3370829 | -2.6043842 | 3.1253617  |
| C  | -1.4773257 | -2.9949511 | 2.3384465  |
| C  | -1.2452896 | -3.7470444 | 1.1553506  |
| C  | -2.0721475 | -3.5592708 | -0.0120360 |
| C  | -1.2431109 | -3.7511893 | -1.1749167 |
| C  | -1.4576705 | -2.9885595 | -2.3538305 |
| C  | -0.3232969 | -2.6307499 | -3.1408830 |
| C  | -0.2885575 | -1.3898548 | -3.8700934 |
| C  | -1.3784330 | -0.4677918 | -3.8261685 |
| C  | -1.0692503 | 0.9186612  | -3.8661236 |
| C  | -1.8835132 | 1.8702817  | -3.1380144 |
| C  | -1.0062532 | 2.9325515  | -2.6945566 |
| C  | -1.2320745 | 3.6195487  | -1.4664550 |
| C  | -0.9860775 | 2.8871287  | 2.6542148  |
| C  | -1.2256067 | 3.5933949  | 1.4306318  |
| C  | -0.0898123 | 4.0463774  | 0.7064847  |
| C  | -0.0911438 | 4.0634778  | -0.7327061 |
| C  | 0.0120664  | 0.6552198  | -0.0472278 |
| C  | -0.0120664 | -0.6552198 | -0.0472278 |
| Sc | 0.0000000  | 0.0000000  | 2.1672489  |
| Sc | 1.9394220  | -0.0555392 | -0.9653948 |
| Sc | -1.9394220 | 0.0555392  | -0.9653948 |

Cartesian coordinates for the neutral 2a isomer of  $\text{Sc}_3\text{C}_2@C_{80}$  (in Å).

85

Energy = -5408.520150710 Hartree

|   |           |           |           |
|---|-----------|-----------|-----------|
| C | 0.000000  | 0.000000  | 0.000000  |
| C | 1.165967  | 0.487988  | 0.694535  |
| C | 0.000000  | -1.246817 | -0.743583 |
| C | 1.219991  | -1.979003 | -0.799826 |
| C | 2.377045  | -1.533068 | -0.062503 |
| C | 2.358047  | -0.340774 | 0.720221  |
| C | -1.165967 | 0.487988  | 0.694535  |
| C | 0.743287  | 1.346453  | 1.807694  |
| C | -1.219991 | -1.979003 | -0.799826 |
| C | 1.219991  | -3.421437 | -0.799826 |
| C | 3.092091  | -2.700220 | 0.390926  |
| C | -0.743287 | 1.346453  | 1.807694  |
| C | 3.131676  | -0.321513 | 1.918152  |
| C | 2.377045  | -3.867372 | -0.062503 |
| C | -2.358047 | -0.340774 | 0.720221  |
| C | -2.377045 | -1.533068 | -0.062503 |
| C | -1.219991 | -3.421437 | -0.799826 |
| C | 1.475737  | 1.197657  | 3.072709  |
| C | 0.000000  | -4.153623 | -0.743583 |
| C | 2.669035  | 0.404917  | 3.081133  |
| C | 3.853547  | -1.476496 | 2.364905  |
| C | 3.799501  | -2.700220 | 1.626466  |
| C | -1.475737 | 1.197657  | 3.072709  |
| C | -3.092091 | -2.700220 | 0.390926  |

|    |           |           |           |
|----|-----------|-----------|-----------|
| C  | -2.377045 | -3.867372 | -0.062503 |
| C  | -3.131676 | -0.321513 | 1.918152  |
| C  | 2.358047  | -5.059666 | 0.720221  |
| C  | 3.121314  | -0.317787 | 4.252799  |
| C  | 0.723527  | 1.178709  | 4.307009  |
| C  | 3.838252  | -1.478728 | 3.803751  |
| C  | 0.000000  | -5.400440 | 0.000000  |
| C  | -2.669035 | 0.404917  | 3.081133  |
| C  | 3.853547  | -3.923944 | 2.364905  |
| C  | -0.723527 | 1.178709  | 4.307009  |
| C  | 1.165967  | -5.888428 | 0.694535  |
| C  | 3.131676  | -5.078927 | 1.918152  |
| C  | -3.853547 | -1.476496 | 2.364905  |
| C  | -3.799501 | -2.700220 | 1.626466  |
| C  | -2.358047 | -5.059666 | 0.720221  |
| C  | -1.165967 | -5.888428 | 0.694535  |
| C  | 1.161046  | 0.440606  | 5.468050  |
| C  | 2.347223  | -0.340290 | 5.445068  |
| C  | 3.782215  | -2.700220 | 4.535209  |
| C  | 3.838252  | -3.921712 | 3.803751  |
| C  | -3.121314 | -0.317787 | 4.252799  |
| C  | -1.161046 | 0.440606  | 5.468050  |
| C  | 0.743287  | -6.746893 | 1.807694  |
| C  | -3.838252 | -1.478728 | 3.803751  |
| C  | 2.669035  | -5.805357 | 3.081133  |
| C  | 0.000000  | -0.019403 | 6.200826  |
| C  | -3.853547 | -3.923944 | 2.364905  |
| C  | -0.743287 | -6.746893 | 1.807694  |
| C  | -3.131676 | -5.078927 | 1.918152  |
| C  | -2.347223 | -0.340290 | 5.445068  |
| C  | 3.121314  | -5.082653 | 4.252799  |
| C  | 2.348864  | -1.539056 | 6.244743  |
| C  | 3.037334  | -2.700220 | 5.763206  |
| C  | 1.475737  | -6.598097 | 3.072709  |
| C  | -3.782215 | -2.700220 | 4.535209  |
| C  | -3.838252 | -3.921712 | 3.803751  |
| C  | -2.669035 | -5.805357 | 3.081133  |
| C  | 0.000000  | -1.191586 | 7.053314  |
| C  | -1.475737 | -6.598097 | 3.072709  |
| C  | 1.242734  | -1.957949 | 7.094135  |
| C  | 2.348864  | -3.861384 | 6.244743  |
| C  | 2.347223  | -5.060151 | 5.445068  |
| C  | -2.348864 | -1.539056 | 6.244743  |
| C  | -3.121314 | -5.082653 | 4.252799  |
| C  | 0.723527  | -6.579149 | 4.307009  |
| C  | -3.037334 | -2.700220 | 5.763206  |
| C  | -1.242734 | -1.957949 | 7.094135  |
| C  | 1.242734  | -3.442491 | 7.094135  |
| C  | -0.723527 | -6.579149 | 4.307009  |
| C  | 1.161046  | -5.841046 | 5.468050  |
| C  | -2.347223 | -5.060151 | 5.445068  |
| C  | -2.348864 | -3.861384 | 6.244743  |
| C  | -1.242734 | -3.442491 | 7.094135  |
| C  | 0.000000  | -4.208854 | 7.053314  |
| C  | -1.161046 | -5.841046 | 5.468050  |
| C  | 0.000000  | -5.381037 | 6.200826  |
| C  | 0.000000  | -2.700220 | 3.239197  |
| C  | 0.000000  | -2.700220 | 1.946083  |
| Sc | 0.000000  | -0.611555 | 2.490479  |
| Sc | 0.000000  | -4.788885 | 2.490479  |
| Sc | 0.000000  | -2.700220 | 5.332461  |

Cartesian coordinates for the monoanionic 1a isomer of Sc<sub>3</sub>C<sub>2</sub>@C<sub>80</sub> (in Å).

85

Energy = -5408.636048460 Hartree

|   |            |            |            |
|---|------------|------------|------------|
| C | 1.2461788  | -3.7618038 | 1.1730790  |
| C | 2.0740194  | -3.5661931 | 0.0111467  |
| C | 1.4594606  | -2.9932865 | 2.3516391  |
| C | 2.5826938  | -2.0908033 | 2.3671654  |
| C | 3.4422506  | -1.9193046 | 1.2296136  |
| C | 3.1410838  | -2.6221611 | 0.0013122  |
| C | -0.0907222 | -4.0717598 | 0.7310526  |
| C | 1.2465776  | -3.7495444 | -1.1556734 |
| C | 0.3234720  | -2.6344787 | 3.1379713  |
| C | 2.5833678  | -0.8591057 | 3.1202942  |
| C | 4.0339982  | -0.5840804 | 1.2822885  |
| C | -0.0888223 | -4.0530271 | -0.7082062 |
| C | 3.4370022  | -1.9458558 | -1.2242228 |
| C | 3.5012049  | 0.0885375  | 2.4891246  |
| C | -1.2351376 | -3.6327703 | 1.4655540  |
| C | -1.0068488 | -2.9380239 | 2.6930017  |
| C | 0.2884326  | -1.3917713 | 3.8654968  |
| C | 1.4791423  | -2.9944430 | -2.3374907 |
| C | 1.3779512  | -0.4680537 | 3.8201503  |
| C | 2.6161630  | -2.1297862 | -2.3807696 |
| C | 3.8966846  | -0.5728785 | -1.2054697 |
| C | 4.1542351  | 0.1400831  | 0.0202542  |
| C | -1.2279024 | -3.6029474 | -1.4331286 |
| C | -1.8815722 | -1.8750428 | 3.1365521  |
| C | -1.0700641 | -0.9218295 | 3.8623909  |
| C | -2.4074868 | -3.2651870 | 0.7335452  |
| C | 3.0650714  | 1.4889689  | 2.4161478  |
| C | 2.5551265  | -0.8736456 | -3.0983337 |
| C | 0.3352609  | -2.6076526 | -3.1207745 |
| C | 3.3549853  | 0.0813737  | -2.3669297 |
| C | 1.0700641  | 0.9218295  | 3.8623909  |
| C | -2.4039744 | -3.2535230 | -0.7022035 |
| C | 3.8218782  | 1.5447203  | 0.0152401  |
| C | -0.9902215 | -2.8958369 | -2.6562301 |
| C | 1.8815722  | 1.8750428  | 3.1365521  |
| C | 3.2923571  | 2.2115261  | 1.1858828  |
| C | -3.2923571 | -2.2115261 | 1.1858828  |
| C | -3.0650714 | -1.4889689 | 2.4161478  |
| C | -1.3779512 | 0.4680537  | 3.8201503  |
| C | -0.2884326 | 1.3917713  | 3.8654968  |
| C | 0.2945091  | -1.4087028 | -3.9330304 |
| C | 1.4191213  | -0.4847839 | -3.8965912 |
| C | 3.0024075  | 1.4660034  | -2.3448651 |
| C | 3.2719644  | 2.1976580  | -1.1520517 |
| C | -3.2719644 | -2.1976580 | -1.1520517 |
| C | -1.8688799 | -1.8606891 | -3.1266419 |
| C | 1.0068488  | 2.9380239  | 2.6930017  |
| C | -3.8218782 | -1.5447203 | 0.0152401  |
| C | 2.4074868  | 3.2651870  | 0.7335452  |
| C | -1.0976382 | -0.9308694 | -3.9344599 |
| C | -3.5012049 | -0.0885375 | 2.4891246  |
| C | -0.3234720 | 2.6344787  | 3.1379713  |
| C | -2.5833678 | 0.8591057  | 3.1202942  |
| C | -3.0024075 | -1.4660034 | -2.3448651 |
| C | 2.4039744  | 3.2535230  | -0.7022035 |
| C | 1.0976382  | 0.9308694  | -3.9344599 |

|    |            |            |            |
|----|------------|------------|------------|
| C  | 1.8688799  | 1.8606891  | -3.1266419 |
| C  | 1.2351376  | 3.6327703  | 1.4655540  |
| C  | -4.1542351 | -0.1400831 | 0.0202542  |
| C  | -4.0339982 | 0.5840804  | 1.2822885  |
| C  | -2.5826938 | 2.0908033  | 2.3671654  |
| C  | -1.4191213 | 0.4847839  | -3.8965912 |
| C  | -1.4594606 | 2.9932865  | 2.3516391  |
| C  | -0.2945091 | 1.4087028  | -3.9330304 |
| C  | 0.9902215  | 2.8958369  | -2.6562301 |
| C  | 1.2279024  | 3.6029474  | -1.4331286 |
| C  | -3.3549853 | -0.0813737 | -2.3669297 |
| C  | -3.4422506 | 1.9193046  | 1.2296136  |
| C  | 0.0907222  | 4.0717598  | 0.7310526  |
| C  | -3.8966846 | 0.5728785  | -1.2054697 |
| C  | -2.5551265 | 0.8736456  | -3.0983337 |
| C  | -0.3352609 | 2.6076526  | -3.1207745 |
| C  | -1.2461788 | 3.7618038  | 1.1730790  |
| C  | 0.0888223  | 4.0530271  | -0.7082062 |
| C  | -3.1410838 | 2.6221611  | 0.0013122  |
| C  | -3.4370022 | 1.9458558  | -1.2242228 |
| C  | -2.6161630 | 2.1297862  | -2.3807696 |
| C  | -1.4791423 | 2.9944430  | -2.3374907 |
| C  | -2.0740194 | 3.5661931  | 0.0111467  |
| C  | -1.2465776 | 3.7495444  | -1.1556734 |
| Sc | 0.0000000  | 0.0000000  | -2.1121601 |
| Sc | 1.9050383  | 0.0433133  | 0.9475671  |
| Sc | -1.9050383 | -0.0433133 | 0.9475671  |
| C  | -0.0027412 | 0.6709166  | 0.0743178  |
| C  | 0.0027412  | -0.6709166 | 0.0743178  |

Cartesian coordinates for the monoanionic 2a isomer of  $\text{Sc}_3\text{C}_2@\text{C}_{80}$  (in Å).

85

Energy=-5408.642091246 Hartree

|   |           |           |           |
|---|-----------|-----------|-----------|
| C | 0.000000  | 0.000000  | 0.000000  |
| C | 1.165938  | 0.483255  | 0.699826  |
| C | 0.000000  | -1.248315 | -0.741416 |
| C | 1.222766  | -1.979966 | -0.798897 |
| C | 2.378879  | -1.534839 | -0.060045 |
| C | 2.356738  | -0.343650 | 0.728640  |
| C | -1.165938 | 0.483255  | 0.699826  |
| C | 0.739981  | 1.323600  | 1.823981  |
| C | -1.222766 | -1.979966 | -0.798897 |
| C | 1.222766  | -3.425586 | -0.798897 |
| C | 3.091843  | -2.702776 | 0.396951  |
| C | -0.739981 | 1.323600  | 1.823981  |
| C | 3.129886  | -0.322340 | 1.929071  |
| C | 2.378879  | -3.870714 | -0.060045 |
| C | -2.356738 | -0.343650 | 0.728640  |
| C | -2.378879 | -1.534839 | -0.060045 |
| C | -1.222766 | -3.425586 | -0.798897 |
| C | 1.470639  | 1.184978  | 3.087410  |
| C | 0.000000  | -4.157238 | -0.741416 |
| C | 2.671317  | 0.404053  | 3.094202  |
| C | 3.850074  | -1.479543 | 2.376937  |
| C | 3.795143  | -2.702776 | 1.636734  |
| C | -1.470639 | 1.184978  | 3.087410  |
| C | -3.091843 | -2.702776 | 0.396951  |
| C | -2.378879 | -3.870714 | -0.060045 |
| C | -3.129886 | -0.322340 | 1.929071  |

|    |           |           |          |
|----|-----------|-----------|----------|
| C  | 2.356738  | -5.061903 | 0.728640 |
| C  | 3.122543  | -0.317617 | 4.267113 |
| C  | 0.722683  | 1.177524  | 4.323745 |
| C  | 3.837683  | -1.480947 | 3.816563 |
| C  | 0.000000  | -5.405553 | 0.000000 |
| C  | -2.671317 | 0.404053  | 3.094202 |
| C  | 3.850074  | -3.926010 | 2.376937 |
| C  | -0.722683 | 1.177524  | 4.323745 |
| C  | 1.165938  | -5.888807 | 0.699826 |
| C  | 3.129886  | -5.083213 | 1.929071 |
| C  | -3.850074 | -1.479543 | 2.376937 |
| C  | -3.795143 | -2.702776 | 1.636734 |
| C  | -2.356738 | -5.061903 | 0.728640 |
| C  | -1.165938 | -5.888807 | 0.699826 |
| C  | 1.163681  | 0.446354  | 5.490113 |
| C  | 2.349590  | -0.336797 | 5.463217 |
| C  | 3.782795  | -2.702776 | 4.548455 |
| C  | 3.837683  | -3.924605 | 3.816563 |
| C  | -3.122543 | -0.317617 | 4.267113 |
| C  | -1.163681 | 0.446354  | 5.490113 |
| C  | 0.739981  | -6.729153 | 1.823981 |
| C  | -3.837683 | -1.480947 | 3.816563 |
| C  | 2.671317  | -5.809606 | 3.094202 |
| C  | 0.000000  | -0.011022 | 6.222588 |
| C  | -3.850074 | -3.926010 | 2.376937 |
| C  | -0.739981 | -6.729153 | 1.823981 |
| C  | -3.129886 | -5.083213 | 1.929071 |
| C  | -2.349590 | -0.336797 | 5.463217 |
| C  | 3.122543  | -5.087936 | 4.267113 |
| C  | 2.353003  | -1.539542 | 6.259077 |
| C  | 3.043414  | -2.702776 | 5.779939 |
| C  | 1.470639  | -6.590531 | 3.087410 |
| C  | -3.782795 | -2.702776 | 4.548455 |
| C  | -3.837683 | -3.924605 | 3.816563 |
| C  | -2.671317 | -5.809606 | 3.094202 |
| C  | 0.000000  | -1.194702 | 7.059327 |
| C  | -1.470639 | -6.590531 | 3.087410 |
| C  | 1.240979  | -1.960649 | 7.098117 |
| C  | 2.353003  | -3.866011 | 6.259077 |
| C  | 2.349590  | -5.068756 | 5.463217 |
| C  | -2.353003 | -1.539542 | 6.259077 |
| C  | -3.122543 | -5.087936 | 4.267113 |
| C  | 0.722683  | -6.583077 | 4.323745 |
| C  | -3.043414 | -2.702776 | 5.779939 |
| C  | -1.240979 | -1.960649 | 7.098117 |
| C  | 1.240979  | -3.444904 | 7.098117 |
| C  | -0.722683 | -6.583077 | 4.323745 |
| C  | 1.163681  | -5.851907 | 5.490113 |
| C  | -2.349590 | -5.068756 | 5.463217 |
| C  | -2.353003 | -3.866011 | 6.259077 |
| C  | -1.240979 | -3.444904 | 7.098117 |
| C  | 0.000000  | -4.210851 | 7.059327 |
| C  | -1.163681 | -5.851907 | 5.490113 |
| C  | 0.000000  | -5.394530 | 6.222588 |
| C  | 0.000000  | -2.702776 | 3.259977 |
| C  | 0.000000  | -2.702776 | 1.928201 |
| Sc | 0.000000  | -4.715718 | 2.490892 |
| Sc | 0.000000  | -2.702776 | 5.293784 |
| Sc | 0.000000  | -0.689835 | 2.490892 |

Cartesian coordinates for the transition state bf 1a<sub>TS</sub> of the neutral 1a isomer of Sc<sub>3</sub>C<sub>2</sub>@C<sub>80</sub> (in Å).  
The transition state has only one imaginary frequency.

85

Energy=-5408.515995012 Hartree

|   |           |           |           |
|---|-----------|-----------|-----------|
| C | 0.000000  | 0.000000  | 0.000000  |
| C | 0.778183  | 0.938491  | -0.766665 |
| C | 0.877760  | 0.906283  | -2.208417 |
| C | 0.005729  | -0.025107 | -2.905250 |
| C | -0.729082 | -0.997489 | -2.150057 |
| C | -0.715574 | -0.996751 | -0.706876 |
| C | 0.936409  | 2.295923  | -0.327736 |
| C | 0.345340  | 2.767524  | 0.897682  |
| C | -0.373720 | 1.818134  | 1.692071  |
| C | -0.549969 | 0.467507  | 1.236906  |
| C | -1.997154 | -1.462092 | -0.239115 |
| C | -2.578035 | -0.941895 | 0.953006  |
| C | -1.812898 | -0.002421 | 1.725746  |
| C | -2.030651 | -1.451347 | -2.569290 |
| C | -2.811043 | -1.739093 | -1.392467 |
| C | 1.137191  | 2.284075  | -2.690887 |
| C | 1.118818  | 3.135210  | -1.487776 |
| C | -1.494824 | 2.184029  | 2.541080  |
| C | -2.411805 | 1.029615  | 2.555329  |
| C | -0.590417 | 0.438451  | -4.118152 |
| C | -0.410231 | 1.811124  | -4.577256 |
| C | 0.423233  | 2.766362  | -3.882116 |
| C | -0.129475 | 4.102383  | -3.827136 |
| C | -0.025843 | 4.961256  | -2.654780 |
| C | 0.551056  | 4.468849  | -1.449015 |
| C | 0.018323  | 4.959100  | -0.210989 |
| C | -0.068252 | 4.120647  | 0.951886  |
| C | -1.253781 | 4.487437  | 1.701687  |
| C | -1.981812 | 3.553896  | 2.519809  |
| C | -3.426311 | 3.729351  | 2.583291  |
| C | -4.345293 | 2.573385  | 2.599306  |
| C | -3.856244 | 1.202171  | 2.550425  |
| C | -4.609018 | 0.269540  | 1.753495  |
| C | -3.995528 | -0.807893 | 1.006905  |
| C | -4.808370 | -1.093301 | -0.138628 |
| C | -4.219856 | -1.520376 | -1.369840 |
| C | -1.891872 | -0.012170 | -4.533934 |
| C | -2.647636 | -0.933832 | -3.743706 |
| C | -4.072988 | -0.799222 | -3.751562 |
| C | -4.851016 | -1.097186 | -2.584197 |
| C | -6.013792 | 4.785260  | -2.809386 |
| C | -6.862292 | 3.852876  | -2.085668 |
| C | -6.716543 | 3.819553  | -0.647930 |
| C | -5.914367 | 4.757115  | 0.093486  |
| C | -5.222484 | 5.754976  | -0.634062 |
| C | -5.255130 | 5.757198  | -2.077135 |
| C | -7.136933 | 2.475181  | -2.560412 |
| C | -6.463893 | 1.993351  | -3.775778 |
| C | -5.652366 | 2.949768  | -4.496175 |
| C | -5.457037 | 4.322212  | -4.041389 |
| C | -3.967321 | 6.211280  | -2.536691 |
| C | -3.387857 | 5.694082  | -3.730228 |
| C | -4.168570 | 4.772569  | -4.496466 |

|    |           |           |           |
|----|-----------|-----------|-----------|
| C  | -3.926722 | 6.219570  | -0.206456 |
| C  | -3.149959 | 6.498131  | -1.384845 |
| C  | -6.859783 | 2.462079  | -0.204890 |
| C  | -7.078811 | 1.623843  | -1.359228 |
| C  | -4.448061 | 2.576292  | -5.212898 |
| C  | -3.555709 | 3.701461  | -5.230842 |
| C  | -5.322427 | 4.286427  | 1.310180  |
| C  | -5.485927 | 2.937087  | 1.774071  |
| C  | -6.231475 | 1.988583  | 1.000637  |
| C  | -5.818971 | 0.635226  | 1.041825  |
| C  | -5.941537 | -0.201885 | -0.118327 |
| C  | -6.511901 | 0.290122  | -1.339047 |
| C  | -5.974177 | -0.201813 | -2.562559 |
| C  | -5.907981 | 0.657846  | -3.737543 |
| C  | -4.708503 | 0.281001  | -4.455819 |
| C  | -3.944361 | 1.241545  | -5.181349 |
| C  | -2.527462 | 1.059466  | -5.248370 |
| C  | -1.635250 | 2.184874  | -5.257233 |
| C  | -2.137284 | 3.519398  | -5.208799 |
| C  | -1.350671 | 4.479504  | -4.507336 |
| C  | -1.963577 | 5.559478  | -3.783157 |
| C  | -1.149151 | 5.856804  | -2.640656 |
| C  | -1.741214 | 6.279515  | -1.406874 |
| C  | -4.046959 | 4.757594  | 1.763039  |
| C  | -3.307588 | 5.699695  | 0.966472  |
| C  | -1.889436 | 5.567074  | 0.975638  |
| C  | -1.113567 | 5.852267  | -0.194902 |
| C  | -2.939541 | 3.042769  | -1.437989 |
| C  | -3.022713 | 1.725315  | -1.426912 |
| Sc | -2.972182 | 2.395076  | 0.782919  |
| Sc | -0.994491 | 2.279319  | -2.180132 |
| Sc | -4.987272 | 2.482646  | -2.129812 |

Cartesian coordinates of Sc<sub>3</sub>@C<sub>82</sub>, quartet state. The energies reported in Table S1 for doublet and sextet are calculated for the quartet structure.

85

Energy= See Table S1

|   |          |           |           |
|---|----------|-----------|-----------|
| C | 2.745219 | 3.272188  | -0.371030 |
| C | 3.094469 | 2.399416  | -1.484370 |
| C | 2.217936 | 2.386733  | -2.629091 |
| C | 3.774783 | 1.164437  | -1.190544 |
| C | 4.018212 | 0.713283  | 0.172499  |
| C | 3.511829 | 1.450362  | 1.292378  |
| C | 2.946190 | 2.751875  | 0.982225  |
| C | 3.623476 | 0.000000  | -2.027986 |
| C | 2.740942 | 0.000000  | -3.167920 |
| C | 2.060444 | 1.223650  | -3.472036 |
| C | 2.060444 | -1.223650 | -3.472036 |
| C | 3.774783 | -1.164437 | -1.190544 |
| C | 2.745219 | -3.272188 | -0.371030 |
| C | 3.094469 | -2.399416 | -1.484370 |
| C | 2.217936 | -2.386733 | -2.629091 |
| C | 2.184180 | 1.414176  | 3.400128  |
| C | 3.080222 | 0.737127  | 2.498603  |
| C | 3.080222 | -0.737127 | 2.498603  |
| C | 3.511829 | -1.450362 | 1.292378  |
| C | 4.018212 | -0.713283 | 0.172499  |
| C | 2.946190 | -2.751875 | 0.982225  |

|    |           |           |           |
|----|-----------|-----------|-----------|
| C  | 0.708898  | -1.227848 | -3.982393 |
| C  | 0.000000  | 0.000000  | -4.210499 |
| C  | 0.708898  | 1.227848  | -3.982393 |
| C  | -1.417797 | 0.000000  | -3.982393 |
| C  | 0.029490  | -2.396222 | -3.472036 |
| C  | -1.811738 | -3.138022 | -2.027986 |
| C  | -1.370471 | -2.373725 | -3.167920 |
| C  | -2.089934 | -1.172572 | -3.472036 |
| C  | 1.461189  | -4.013523 | -0.371030 |
| C  | 0.530720  | -3.879597 | -1.484370 |
| C  | 0.958003  | -3.114155 | -2.629091 |
| C  | -0.878960 | -3.851276 | -1.190544 |
| C  | -2.089934 | 1.172572  | -3.472036 |
| C  | -1.370471 | 2.373725  | -3.167920 |
| C  | 0.029490  | 2.396222  | -3.472036 |
| C  | -1.811738 | 3.138022  | -2.027986 |
| C  | -3.175939 | 0.727422  | -2.629091 |
| C  | -4.206407 | 0.741335  | -0.371030 |
| C  | -3.625189 | 1.480181  | -1.484370 |
| C  | -2.895823 | 2.686839  | -1.190544 |
| C  | -2.895823 | -2.686839 | -1.190544 |
| C  | -3.625189 | -1.480181 | -1.484370 |
| C  | -3.175939 | -0.727422 | -2.629091 |
| C  | -4.206407 | -0.741335 | -0.371030 |
| C  | -0.878960 | 3.851276  | -1.190544 |
| C  | 0.530720  | 3.879597  | -1.484370 |
| C  | 0.958003  | 3.114155  | -2.629091 |
| C  | 1.461189  | 4.013523  | -0.371030 |
| C  | -1.391385 | 3.836515  | 0.172499  |
| C  | -0.499864 | 3.766514  | 1.292378  |
| C  | 0.910098  | 3.927413  | 0.982225  |
| C  | 1.523796  | 2.639292  | 3.003035  |
| C  | 1.884563  | 3.264159  | 1.806488  |
| C  | -2.316802 | 1.184468  | 3.400128  |
| C  | -2.178481 | 2.298987  | 2.498603  |
| C  | -0.901741 | 3.036114  | 2.498603  |
| C  | 0.132622  | 2.598643  | 3.400128  |
| C  | -2.626827 | 3.123233  | 0.172499  |
| C  | -3.856288 | 1.175538  | 0.982225  |
| C  | -3.011965 | 2.316152  | 1.292378  |
| C  | -1.231146 | -0.726311 | 4.232933  |
| C  | -1.231146 | 0.726311  | 4.232933  |
| C  | -0.013431 | 1.429359  | 4.232933  |
| C  | -0.013431 | -1.429359 | 4.232933  |
| C  | -3.769126 | 0.000000  | 1.806488  |
| C  | -2.316802 | -1.184468 | 3.400128  |
| C  | -3.047592 | 0.000000  | 3.003035  |
| C  | -2.626827 | -3.123233 | 0.172499  |
| C  | 0.132622  | -2.598643 | 3.400128  |
| C  | -0.901741 | -3.036114 | 2.498603  |
| C  | -2.178481 | -2.298987 | 2.498603  |
| C  | -3.011965 | -2.316152 | 1.292378  |
| C  | -3.856288 | -1.175538 | 0.982225  |
| C  | 1.523796  | -2.639292 | 3.003035  |
| C  | 1.884563  | -3.264159 | 1.806488  |
| C  | 0.910098  | -3.927413 | 0.982225  |
| C  | -0.499864 | -3.766514 | 1.292378  |
| C  | -1.391385 | -3.836515 | 0.172499  |
| C  | 1.244577  | 0.703048  | 4.232933  |
| C  | 1.244577  | -0.703048 | 4.232933  |
| C  | 2.184180  | -1.414176 | 3.400128  |
| Sc | -2.094745 | 0.000000  | -0.291519 |
| Sc | 1.047373  | -1.814102 | -0.291519 |
| Sc | 1.047373  | 1.814102  | -0.291519 |



Cartesian coordinates of the distorted  $C_1$ -symmetric structure of the neutral doublet 1a isomer  
 $\text{Sc}_3\text{C}_2@C_{80}$

85

Energy= See Table S1

|   |            |            |            |
|---|------------|------------|------------|
| C | 4.1589651  | -0.1553099 | -0.2113666 |
| C | 3.9917104  | 0.5996067  | -1.4532020 |
| C | 3.3937566  | -0.0452785 | -2.6492991 |
| C | 2.9563460  | -1.4463476 | -2.5925259 |
| C | 3.2321698  | -2.1932067 | -1.3880694 |
| C | 3.8194486  | -1.5550122 | -0.2225949 |
| C | 3.3931826  | 1.9301442  | -1.3381659 |
| C | 3.1478218  | 2.6096288  | -0.0814711 |
| C | 3.4866009  | 1.9016809  | 1.1113372  |
| C | 3.9357011  | 0.5278464  | 1.0380061  |
| C | 3.3109484  | -2.2327231 | 0.9512537  |
| C | 3.0881018  | -1.5306279 | 2.1711356  |
| C | 3.4354307  | -0.1521393 | 2.2048615  |
| C | 2.3598891  | -3.2472692 | -0.9170310 |
| C | 2.4174693  | -3.2694860 | 0.5165876  |
| C | 2.4436040  | 0.9168604  | -3.2085695 |
| C | 2.4809977  | 2.1278747  | -2.4285909 |
| C | 2.7193644  | 2.0614979  | 2.3077257  |
| C | 2.6764975  | 0.7876533  | 2.9981026  |
| C | 1.7344491  | -1.8041671 | -3.2586288 |
| C | 0.8934409  | -0.8344208 | -3.9283326 |
| C | 1.2081456  | 0.5494040  | -3.8693660 |
| C | 0.1213012  | 1.4751939  | -3.8449182 |
| C | 0.1934227  | 2.6983539  | -3.0893454 |
| C | 1.3628678  | 3.0352189  | -2.3458404 |
| C | 1.2037295  | 3.7724398  | -1.1416663 |
| C | 2.0833727  | 3.5506476  | -0.0216105 |
| C | 1.3088066  | 3.7117015  | 1.1860781  |
| C | 1.5913662  | 2.9309120  | 2.3391191  |
| C | 0.4851468  | 2.5211418  | 3.1690550  |
| C | 0.4778181  | 1.3203534  | 3.9906256  |
| C | 1.5923562  | 0.3866532  | 3.8594426  |
| C | 1.2636239  | -1.0265111 | 3.8559291  |
| C | 1.9935114  | -1.9425909 | 2.9979586  |
| C | 1.0954365  | -2.9672888 | 2.5477712  |
| C | 1.2750596  | -3.6375233 | 1.2943552  |
| C | 0.8745791  | -2.8751970 | -2.8028966 |
| C | 1.1521864  | -3.5916922 | -1.6023327 |
| C | 0.0435872  | -4.0501168 | -0.8293474 |
| C | 0.1059314  | -4.0677403 | 0.6084522  |
| C | -4.1475764 | 0.1435879  | 0.1628248  |
| C | -3.8375188 | -0.5982664 | 1.3588468  |
| C | -3.2389419 | 0.0285596  | 2.5072677  |
| C | -2.8820935 | 1.4035248  | 2.4998901  |
| C | -3.2046339 | 2.1655887  | 1.3409218  |
| C | -3.8097089 | 1.5405393  | 0.1853407  |
| C | -3.3792733 | -1.9684871 | 1.3264088  |
| C | -3.1478757 | -2.6169685 | 0.0751717  |
| C | -3.5001874 | -1.8819375 | -1.1235899 |
| C | -4.0958236 | -0.5475530 | -1.1229620 |
| C | -3.3329847 | 2.2362313  | -0.9959652 |
| C | -3.1755657 | 1.5527075  | -2.2576588 |
| C | -3.6227492 | 0.1531015  | -2.3440497 |
| C | -2.3562252 | 3.2284349  | 0.8777043  |
| C | -2.4251876 | 3.2747750  | -0.5543745 |

|    |            |            |            |
|----|------------|------------|------------|
| C  | -2.4065125 | -0.9421384 | 3.1845525  |
| C  | -2.5051185 | -2.1800806 | 2.4402620  |
| C  | -2.6938775 | -2.0275887 | -2.3022341 |
| C  | -2.7294366 | -0.7825144 | -3.0320597 |
| C  | -1.7121272 | 1.7742297  | 3.2492496  |
| C  | -0.9228332 | 0.8422852  | 4.0408850  |
| C  | -1.2479104 | -0.5772812 | 3.9599079  |
| C  | -0.1285518 | -1.5006004 | 3.9042772  |
| C  | -0.2068904 | -2.6875176 | 3.0759355  |
| C  | -1.3818845 | -3.0513078 | 2.3327379  |
| C  | -1.2072740 | -3.7770523 | 1.1225003  |
| C  | -2.0839494 | -3.5577946 | -0.0022922 |
| C  | -1.3078010 | -3.7245111 | -1.2056184 |
| C  | -1.5718476 | -2.9334402 | -2.3559015 |
| C  | -0.4720555 | -2.5593824 | -3.1831091 |
| C  | -0.4648720 | -1.3014815 | -3.8837000 |
| C  | -1.5493988 | -0.3787306 | -3.7719593 |
| C  | -1.2367653 | 1.0081987  | -3.7929690 |
| C  | -2.0147458 | 1.9458773  | -3.0093618 |
| C  | -1.1142132 | 2.9944948  | -2.5792704 |
| C  | -1.2831132 | 3.6546501  | -1.3263927 |
| C  | -0.8547189 | 2.8142489  | 2.7562096  |
| C  | -1.1479423 | 3.5577743  | 1.5642614  |
| C  | -0.0437641 | 4.0261459  | 0.8029519  |
| C  | -0.1086207 | 4.0777682  | -0.6339613 |
| C  | 0.0053998  | 0.6854948  | -0.0995069 |
| C  | -0.0124734 | -0.6205249 | 0.0001677  |
| Sc | 0.0642604  | 0.0569876  | 2.1645436  |
| Sc | 1.9142574  | -0.0402272 | -1.0162930 |
| Sc | -1.9647585 | 0.0678744  | -0.9115234 |

**Cartesian coordinates of the distorted  $C_1$ -symmetric structure of the neutral doublet 2a isomer  
 $\text{Sc}_3\text{C}_2@C_{80}$**

85

Energy= See Table S1

|   |            |            |            |
|---|------------|------------|------------|
| C | 0.2672624  | 3.0871446  | 2.7058242  |
| C | 1.3687224  | 2.2821267  | 3.1858092  |
| C | 0.3361823  | 3.8354815  | 1.4581688  |
| C | 1.5631729  | 3.7789966  | 0.7238341  |
| C | 2.6560200  | 2.9391277  | 1.1706794  |
| C | 2.5661805  | 2.1562408  | 2.3659053  |
| C | -0.9602558 | 2.5066181  | 3.2074778  |
| C | 0.8471664  | 1.2129233  | 4.0455024  |
| C | -0.8801346 | 4.0077705  | 0.7239475  |
| C | 1.5631727  | 3.7789967  | -0.7238340 |
| C | 3.3334507  | 2.4247210  | 0.0000000  |
| C | -0.6357588 | 1.3537745  | 4.0694039  |
| C | 3.2380703  | 0.8910885  | 2.3902094  |
| C | 2.6560202  | 2.9391276  | -1.1706792 |
| C | -2.1524291 | 2.5874737  | 2.3713793  |
| C | -2.1024761 | 3.3727947  | 1.1723159  |
| C | -0.8801346 | 4.0077705  | -0.7239475 |
| C | 1.4710951  | -0.1128549 | 3.8994038  |
| C | 0.3361824  | 3.8354815  | -1.4581688 |
| C | 2.6715725  | -0.2297165 | 3.1173431  |
| C | 3.9211823  | 0.3804865  | 1.2299943  |
| C | 3.9312761  | 1.1240818  | -0.0000000 |
| C | -1.4800436 | 0.1530010  | 3.9212075  |

|    |            |            |              |
|----|------------|------------|--------------|
| C  | -2.8570709 | 2.9817416  | 0.0000000    |
| C  | -2.1024760 | 3.3727947  | -1.1723159   |
| C  | -3.0319882 | 1.4557638  | 2.3886081    |
| C  | 2.5661792  | 2.1562410  | -2.3659070   |
| C  | 3.0195989  | -1.4429396 | 2.3939012    |
| C  | 0.6126628  | -1.2787783 | 3.8903933    |
| C  | 3.7778870  | -1.0574445 | 1.2274632    |
| C  | 0.2672625  | 3.0871445  | -2.7058242   |
| C  | -2.6716792 | 0.2501432  | 3.1180181    |
| C  | 3.9211824  | 0.3804865  | -1.2299944   |
| C  | -0.8337336 | -1.1475831 | 3.8884686    |
| C  | 1.3687227  | 2.2821268  | -3.1858092   |
| C  | 3.2380722  | 0.8910883  | -2.3902088   |
| C  | -3.7943156 | 1.0736124  | 1.2294711    |
| C  | -3.6754858 | 1.8088354  | -0.0000000   |
| C  | -2.1524291 | 2.5874738  | -2.3713790   |
| C  | -0.9602558 | 2.5066181  | -3.2074778   |
| C  | 0.9500159  | -2.4815864 | 3.1576084    |
| C  | 2.1384681  | -2.5654179 | 2.3729308    |
| C  | 3.6548477  | -1.7824566 | -0.0000000   |
| C  | 3.7778870  | -1.0574445 | -1.2274632   |
| C  | -3.2316080 | -0.8795534 | 2.3935570    |
| C  | -1.3724170 | -2.2697098 | 3.1452815    |
| C  | 0.8471664  | 1.2129233  | -4.0455024   |
| C  | -3.9084075 | -0.3674725 | 1.2277531    |
| C  | 2.6715724  | -0.2297166 | -3.1173438   |
| C  | -0.2754290 | -3.1055532 | 2.6875010    |
| C  | -3.7943156 | 1.0736124  | -1.2294710   |
| C  | -0.6357588 | 1.3537745  | -4.0694038   |
| C  | -3.0319883 | 1.4557638  | -2.3886082   |
| C  | -2.5614624 | -2.1420537 | 2.3647875    |
| C  | 3.0195989  | -1.4429397 | -2.3939013   |
| C  | 2.0652761  | -3.3710067 | 1.1658314    |
| C  | 2.7914124  | -2.9399741 | 0.0000000    |
| C  | 1.4710952  | -0.1128549 | -3.8994039   |
| C  | -3.9212918 | -1.1076739 | -0.0000000   |
| C  | -3.9084075 | -0.3674725 | -1.2277531   |
| C  | -2.6716791 | 0.2501432  | -3.1180181   |
| C  | -0.3483943 | -3.9544278 | 1.5091977C   |
| C  | -1.4800436 | 0.1530010  | -3.9212075C  |
| C  | 0.8970586  | -4.1503810 | 0.7479075C   |
| C  | 2.0652762  | -3.3710066 | -1.1658314C  |
| C  | 2.1384681  | -2.5654179 | -2.3729308C  |
| C  | -2.6409974 | -2.9392777 | 1.1661679C   |
| C  | -3.2316080 | -0.8795534 | -2.3935570C  |
| C  | 0.6126628  | -1.2787782 | -3.8903933C  |
| C  | -3.2951359 | -2.4062534 | -0.0000000C  |
| C  | -1.5814896 | -3.8461769 | 0.7384288C   |
| C  | 0.8970585  | -4.1503810 | -0.7479075C  |
| C  | -0.8337336 | -1.1475831 | -3.8884686C  |
| C  | 0.9500159  | -2.4815863 | -3.1576083C  |
| C  | -2.5614623 | -2.1420537 | -2.3647875C  |
| C  | -2.6409974 | -2.9392777 | -1.1661679C  |
| C  | -1.5814896 | -3.8461769 | -0.7384288C  |
| C  | -0.3483943 | -3.9544278 | -1.5091977C  |
| C  | -1.3724170 | -2.2697098 | -3.1452815C  |
| C  | -0.2754289 | -3.1055532 | -2.6875011C  |
| C  | 0.1844728  | -0.1625080 | -0.0000000C  |
| C  | 0.0242648  | 1.1309134  | 0.0000000C   |
| Sc | -0.0190192 | 0.6117929  | 2.0974719Sc  |
| Sc | -0.0190195 | 0.6117930  | -2.0974719Sc |
| Sc | 0.0044587  | -2.2544655 | 0.0000000Sc  |

Cartesian coordinates of the distorted  $C_1$ -symmetric structure of the anionic 1a isomer  $\text{Sc}_3\text{C}_2@C_{80}$

85

Energy= See Table S1

|   |            |            |            |
|---|------------|------------|------------|
| C | 3.9653195  | -0.2399362 | -1.3215777 |
| C | 3.4751487  | 0.5436859  | -2.4605078 |
| C | 2.5340949  | -0.0765606 | -3.4189149 |
| C | 2.1036181  | -1.4631692 | -3.2583575 |
| C | 2.6953240  | -2.2424609 | -2.1986429 |
| C | 3.6004936  | -1.6403129 | -1.2421766 |
| C | 2.9552378  | 1.8903426  | -2.1862374 |
| C | 3.0542381  | 2.5507065  | -0.9013097 |
| C | 3.6811752  | 1.8137702  | 0.1519231  |
| C | 4.0692980  | 0.4297530  | -0.0477875 |
| C | 3.4109470  | -2.3248019 | 0.0228066  |
| C | 3.5403051  | -1.6426593 | 1.2686911  |
| C | 3.8862677  | -0.2564228 | 1.2084439  |
| C | 1.9612699  | -3.2903831 | -1.5274278 |
| C | 2.4053151  | -3.3367252 | -0.1627328 |
| C | 1.4994941  | 0.9067728  | -3.7125041 |
| C | 1.7780517  | 2.1150657  | -2.9823367 |
| C | 3.2708133  | 1.9727161  | 1.5114033  |
| C | 3.3917486  | 0.6914719  | 2.1784857  |
| C | 0.7533810  | -1.8042369 | -3.6077760 |
| C | -0.2121469 | -0.8122256 | -4.0218199 |
| C | 0.1323483  | 0.5666696  | -4.0341268 |
| C | -0.8887276 | 1.5109346  | -3.7153544 |
| C | -0.5940537 | 2.7267726  | -3.0028516 |
| C | 0.7401716  | 3.0390414  | -2.6002769 |
| C | 0.9239588  | 3.7725165  | -1.3927687 |
| C | 2.0646612  | 3.5162686  | -0.5521210 |
| C | 1.6421309  | 3.6650563  | 0.8215377  |
| C | 2.2064187  | 2.8633301  | 1.8508039  |
| C | 1.3592468  | 2.4700310  | 2.9544877  |
| C | 1.5518419  | 1.2596434  | 3.7476125  |
| C | 2.5627868  | 0.3009642  | 3.2955656  |
| C | 2.2067244  | -1.1015811 | 3.3384523  |
| C | 2.6945002  | -2.0455152 | 2.3475625  |
| C | 1.6875095  | -3.0530367 | 2.1556322  |
| C | 1.5049281  | -3.6963466 | 0.8896756  |
| C | 0.0301380  | -2.8687301 | -2.9528934 |
| C | 0.6075717  | -3.6021681 | -1.8715779 |
| C | -0.2636250 | -4.0494800 | -0.8337513 |
| C | 0.1807753  | -4.0879610 | 0.5342695  |
| C | -3.9321211 | 0.1958837  | 1.2675644  |
| C | -3.3618701 | -0.5669737 | 2.3465071  |
| C | -2.4745569 | 0.0351976  | 3.3043677  |
| C | -2.0928075 | 1.4041414  | 3.1958295  |
| C | -2.6925473 | 2.1903623  | 2.1682107  |
| C | -3.5851174 | 1.5894421  | 1.2097520  |
| C | -2.9513203 | -1.9404570 | 2.1753994  |
| C | -3.0698883 | -2.5753124 | 0.8996105  |
| C | -3.7118086 | -1.8254622 | -0.1582195 |
| C | -4.2318604 | -0.4751827 | 0.0114029  |
| C | -3.4335726 | 2.2902644  | -0.0474748 |
| C | -3.6384944 | 1.6200409  | -1.3099263 |
| C | -4.1239983 | 0.2278100  | -1.2873883 |
| C | -1.9803800 | 3.2512643  | 1.5033490  |
| C | -2.4281544 | 3.3193336  | 0.1407491  |

|    |            |            |            |
|----|------------|------------|------------|
| C  | -1.5072095 | -0.9564984 | 3.7155407  |
| C  | -1.8121708 | -2.1801143 | 3.0126533  |
| C  | -3.2694168 | -1.9751379 | -1.5169080 |
| C  | -3.4877292 | -0.7213220 | -2.2091774 |
| C  | -0.7568937 | 1.7500313  | 3.6025619  |
| C  | 0.2002630  | 0.7980119  | 4.1402055  |
| C  | -0.1652428 | -0.6107680 | 4.1016586  |
| C  | 0.8747590  | -1.5466756 | 3.7385050  |
| C  | 0.5680187  | -2.7474332 | 3.0005677  |
| C  | -0.7716607 | -3.0697064 | 2.6011088  |
| C  | -0.9434481 | -3.7829996 | 1.3811944  |
| C  | -2.0847089 | -3.5391370 | 0.5350736  |
| C  | -1.6627659 | -3.7017169 | -0.8328742 |
| C  | -2.2117057 | -2.8931307 | -1.8678126 |
| C  | -1.3638736 | -2.5276098 | -2.9573463 |
| C  | -1.5194909 | -1.2571177 | -3.6190982 |
| C  | -2.5228843 | -0.3189457 | -3.2171517 |
| C  | -2.1949825 | 1.0678260  | -3.3069169 |
| C  | -2.7197596 | 2.0160398  | -2.3480053 |
| C  | -1.7169854 | 3.0443593  | -2.1648023 |
| C  | -1.5330539 | 3.6981673  | -0.9069682 |
| C  | -0.0395368 | 2.7832402  | 2.9062486  |
| C  | -0.6273780 | 3.5502760  | 1.8424488  |
| C  | 0.2426379  | 4.0115907  | 0.8161949  |
| C  | -0.2026920 | 4.0871033  | -0.5504011 |
| C  | -0.0780650 | 0.7655651  | -0.2704702 |
| C  | -0.0209704 | -0.5286864 | 0.0800328  |
| Sc | 0.6677613  | 0.2021624  | 1.9949798  |
| Sc | 1.6416820  | 0.0006416  | -1.3472386 |
| Sc | -2.0778707 | 0.0840456  | -0.4867191 |

Cartesian coordinates of the distorted  $C_1$ -symmetric structure of the anionic 2a isomer  $\text{Sc}_3\text{C}_2@C_{80}$

85

Energy= See Table S1

|   |            |            |            |
|---|------------|------------|------------|
| C | 0.2789823  | 3.1076729  | 2.6976296  |
| C | 1.3738622  | 2.3014361  | 3.1758389  |
| C | 0.3498105  | 3.8483445  | 1.4519628  |
| C | 1.5698290  | 3.7863619  | 0.7207749  |
| C | 2.6553998  | 2.9466320  | 1.1663495  |
| C | 2.5638124  | 2.1685422  | 2.3564787  |
| C | -0.9465557 | 2.5331628  | 3.1960747  |
| C | 0.8510136  | 1.2366161  | 4.0327848  |
| C | -0.8592255 | 4.0230499  | 0.7204929  |
| C | 1.5700262  | 3.7860336  | -0.7215001 |
| C | 3.3271708  | 2.4310172  | 0.0001241  |
| C | -0.6281002 | 1.3825285  | 4.0564845  |
| C | 3.2275175  | 0.9070567  | 2.3802108  |
| C | 2.6556904  | 2.9461221  | -1.1664596 |
| C | -2.1323012 | 2.6153449  | 2.3611265  |
| C | -2.0789236 | 3.3956600  | 1.1671256  |
| C | -0.8589802 | 4.0227805  | -0.7221227 |
| C | 1.4674958  | -0.0876175 | 3.8875139  |
| C | 0.3502582  | 3.8477981  | -1.4531135 |
| C | 2.6600006  | -0.2071992 | 3.1056072  |
| C | 3.9043508  | 0.3954950  | 1.2243612  |
| C | 3.9176858  | 1.1353254  | 0.0004058  |
| C | -1.4731581 | 0.1879469  | 3.9084969  |
| C | -2.8308424 | 3.0082610  | -0.0009822 |
| C | -2.0785297 | 3.3952638  | -1.1689476 |
| C | -3.0107985 | 1.4917675  | 2.3779088  |
| C | 2.5644459  | 2.1676724  | -2.3563454 |
| C | 3.0012768  | -1.4168800 | 2.3835891  |
| C | 0.6080996  | -1.2461790 | 3.8797543  |
| C | 3.7578401  | -1.0359779 | 1.2222675  |
| C | 0.2798099  | 3.1067459  | -2.6985689 |
| C | -2.6571442 | 0.2898603  | 3.1059458  |
| C | 3.9047146  | 0.3951191  | -1.2233026 |
| C | -0.8334880 | -1.1102756 | 3.8782516  |
| C | 1.3747913  | 2.3003246  | -3.1761198 |
| C | 3.2281973  | 0.9062445  | -2.3794934 |
| C | -3.7695993 | 1.1130842  | 1.2226622  |
| C | -3.6490911 | 1.8442624  | -0.0009336 |
| C | -2.1315412 | 2.6145633  | -2.3627373 |
| C | -0.9455432 | 2.5321333  | -3.1972315 |
| C | 0.9395908  | -2.4438859 | 3.1459173  |
| C | 2.1216380  | -2.5313755 | 2.3642320  |
| C | 3.6333255  | -1.7570333 | 0.0008240  |
| C | 3.7581474  | -1.0363281 | -1.2207700 |
| C | -3.2158461 | -0.8336610 | 2.3819059  |
| C | -1.3729322 | -2.2237461 | 3.1330776  |
| C | 0.8522338  | 1.2352097  | -4.0328037 |
| C | -3.8881059 | -0.3214359 | 1.2211058  |
| C | 2.6609001  | -0.2082234 | -3.1046886 |
| C | -0.2835115 | -3.0620103 | 2.6793657  |
| C | -3.7691449 | 1.1126790  | -1.2242885 |
| C | -0.6268381 | 1.3811802  | -4.0571816 |
| C | -3.0099734 | 1.4909202  | -2.3793964 |
| C | -2.5552357 | -2.0930101 | 2.3554885  |
| C | 3.0019955  | -1.4176262 | -2.3822483 |
| C | 2.0475514  | -3.3335267 | 1.1626716  |

|    |            |            |            |
|----|------------|------------|------------|
| C  | 2.7727225  | -2.9088581 | 0.0008693  |
| C  | 1.4686628  | -0.0889281 | -3.8868822 |
| C  | -3.9020630 | -1.0573631 | -0.0004802 |
| C  | -3.8876202 | -0.3218051 | -1.2223427 |
| C  | -2.6561198 | 0.2888214  | -3.1069759 |
| C  | -0.3599777 | -3.9068554 | 1.5055150  |
| C  | -1.4719445 | 0.1866695  | -3.9090640 |
| C  | 0.8798311  | -4.1042219 | 0.7466397  |
| C  | 2.0479419  | -3.3338157 | -1.1610178 |
| C  | 2.1223419  | -2.5320660 | -2.3627903 |
| C  | -2.6363191 | -2.8858142 | 1.1615583  |
| C  | -3.2149744 | -0.8343946 | -2.3826842 |
| C  | 0.6093043  | -1.2473851 | -3.8790865 |
| C  | -3.2845381 | -2.3524216 | -0.0001780 |
| C  | -1.5884206 | -3.7987988 | 0.7373628  |
| C  | 0.8800504  | -4.1043323 | -0.7451007 |
| C  | -0.8322795 | -1.1115100 | -3.8781575 |
| C  | 0.9405681  | -2.4447659 | -3.1448156 |
| C  | -2.5544069 | -2.0937058 | -2.3557125 |
| C  | -2.6359110 | -2.8860883 | -1.1615171 |
| C  | -1.5881843 | -3.7989298 | -0.7367023 |
| C  | -0.3594811 | -3.9071067 | -1.5043837 |
| C  | -1.3719382 | -2.2247063 | -3.1328570 |
| C  | -0.2826313 | -3.0627498 | -2.6785148 |
| C  | 0.1936513  | -0.1192590 | 0.0000416  |
| C  | 0.0305798  | 1.1639587  | -0.0001965 |
| Sc | -0.0153712 | 0.6302588  | 2.0882052  |
| Sc | -0.0152473 | 0.6295871  | -2.0883535 |
| Sc | -0.0150413 | -2.2050586 | 0.0006553  |

Cartesian coordinates of the neutral closed-shell  $\text{Sc}_2\text{C}_2@C_{84}$

88

Energy= -4800.124353642 Hartree

|   |            |            |            |
|---|------------|------------|------------|
| C | -1.1580717 | -2.1957429 | -3.3977383 |
| C | 0.1732505  | -1.8192257 | -3.8200476 |
| C | -3.3031967 | -2.3198927 | -1.5121989 |
| C | -2.3234511 | -3.3003403 | -1.5142301 |
| C | -1.2452847 | -3.2551755 | -2.4686106 |
| C | -3.8209458 | -1.8272301 | -0.2693216 |
| C | -1.8289028 | -3.8153109 | -0.2697981 |
| C | -2.2176466 | -3.2515004 | 0.9764263  |
| C | -3.2574036 | -2.2150133 | 0.9776579  |
| C | -2.3307877 | -1.3184779 | 3.0920578  |
| C | -3.3056517 | -1.2271416 | 2.0540351  |
| C | -3.8387158 | 0.0679175  | 1.8271817  |
| C | -0.0699862 | -3.8301117 | -1.8260604 |
| C | 1.2270489  | -3.2975187 | -2.0518348 |
| C | 1.3197848  | -2.3246991 | -3.0892345 |
| C | 2.3307877  | -1.3184779 | -3.0920578 |
| C | 3.3056517  | -1.2271416 | -2.0540351 |
| C | 3.8387158  | 0.0679175  | -1.8271817 |
| C | -0.4660691 | -4.2339172 | -0.5131978 |
| C | 2.2176466  | -3.2515004 | -0.9764263 |
| C | 3.2574036  | -2.2150133 | -0.9776579 |
| C | 0.4660691  | -4.2339172 | 0.5131978  |
| C | 1.8289028  | -3.8153109 | 0.2697981  |
| C | 0.0699862  | -3.8301117 | 1.8260604  |
| C | -1.3197848 | -2.3246991 | 3.0892345  |

|    |            |            |            |
|----|------------|------------|------------|
| C  | -1.2270489 | -3.2975187 | 2.0518348  |
| C  | 1.8242554  | -0.1746950 | -3.8209781 |
| C  | 3.2581970  | 1.2405279  | -2.4663051 |
| C  | 2.2005618  | 1.1549141  | -3.3982467 |
| C  | 3.3031967  | 2.3198927  | -1.5121989 |
| C  | 2.3234511  | 3.3003403  | -1.5142301 |
| C  | 4.2413755  | -0.4649909 | 0.5133508  |
| C  | 4.2413755  | 0.4649909  | -0.5133508 |
| C  | 3.8209458  | 1.8272301  | -0.2693216 |
| C  | 3.8209458  | -1.8272301 | 0.2693216  |
| C  | 0.5106146  | -0.5105202 | -4.3447688 |
| C  | 1.2452847  | 3.2551755  | -2.4686106 |
| C  | 1.1580717  | 2.1957429  | -3.3977383 |
| C  | -0.1732505 | 1.8192257  | -3.8200476 |
| C  | -0.5106146 | 0.5105202  | -4.3447688 |
| C  | 0.4660691  | 4.2339172  | -0.5131978 |
| C  | 0.0699862  | 3.8301117  | -1.8260604 |
| C  | -1.2270489 | 3.2975187  | -2.0518348 |
| C  | -1.3197848 | 2.3246991  | -3.0892345 |
| C  | -0.4660691 | 4.2339172  | 0.5131978  |
| C  | 1.8289028  | 3.8153109  | -0.2697981 |
| C  | 2.2176466  | 3.2515004  | 0.9764263  |
| C  | 3.2574036  | 2.2150133  | 0.9776579  |
| C  | -3.2581970 | -1.2405279 | -2.4663051 |
| C  | -2.2005618 | -1.1549141 | -3.3982467 |
| C  | -1.8242554 | 0.1746950  | -3.8209781 |
| C  | -2.3307877 | 1.3184779  | -3.0920578 |
| C  | -3.3056517 | 1.2271416  | -2.0540351 |
| C  | -3.8387158 | -0.0679175 | -1.8271817 |
| C  | -4.2413755 | 0.4649909  | 0.5133508  |
| C  | -4.2413755 | -0.4649909 | -0.5133508 |
| C  | -1.8289028 | 3.8153109  | 0.2697981  |
| C  | -2.2176466 | 3.2515004  | -0.9764263 |
| C  | -3.2574036 | 2.2150133  | -0.9776579 |
| C  | -3.8209458 | 1.8272301  | 0.2693216  |
| C  | -1.2452847 | 3.2551755  | 2.4686106  |
| C  | -2.3234511 | 3.3003403  | 1.5142301  |
| C  | -3.3031967 | 2.3198927  | 1.5121989  |
| C  | 0.1732505  | 1.8192257  | 3.8200476  |
| C  | -1.1580717 | 2.1957429  | 3.3977383  |
| C  | 3.8387158  | -0.0679175 | 1.8271817  |
| C  | 3.3056517  | 1.2271416  | 2.0540351  |
| C  | 2.3307877  | 1.3184779  | 3.0920578  |
| C  | 1.3197848  | 2.3246991  | 3.0892345  |
| C  | 1.2270489  | 3.2975187  | 2.0518348  |
| C  | -0.0699862 | 3.8301117  | 1.8260604  |
| C  | 2.3234511  | -3.3003403 | 1.5142301  |
| C  | 3.3031967  | -2.3198927 | 1.5121989  |
| C  | 2.2005618  | -1.1549141 | 3.3982467  |
| C  | 3.2581970  | -1.2405279 | 2.4663051  |
| C  | 1.8242554  | 0.1746950  | 3.8209781  |
| C  | -0.5106146 | -0.5105202 | 4.3447688  |
| C  | -0.1732505 | -1.8192257 | 3.8200476  |
| C  | 1.1580717  | -2.1957429 | 3.3977383  |
| C  | 1.2452847  | -3.2551755 | 2.4686106  |
| C  | 0.5106146  | 0.5105202  | 4.3447688  |
| C  | -3.2581970 | 1.2405279  | 2.4663051  |
| C  | -2.2005618 | 1.1549141  | 3.3982467  |
| C  | -1.8242554 | -0.1746950 | 3.8209781  |
| C  | 0.6376532  | 0.0000000  | 0.0000000  |
| C  | -0.6376532 | 0.0000000  | 0.0000000  |
| Sc | 0.0000000  | 0.0000000  | 2.2188643  |
| Sc | 0.0000000  | 0.0000000  | -2.2188643 |



Cartesian coordinates of the anionic doublet  $\text{Sc}_2\text{C}_2@C_{84}$

88

Energy= -4800.236380102 Hartree

|   |            |            |            |
|---|------------|------------|------------|
| C | -1.1585393 | -2.1943040 | -3.4040934 |
| C | 0.1724453  | -1.8195939 | -3.8274004 |
| C | -3.3010629 | -2.3171563 | -1.5130880 |
| C | -2.3205848 | -3.2981233 | -1.5148697 |
| C | -1.2466437 | -3.2605818 | -2.4759816 |
| C | -3.8252477 | -1.8280773 | -0.2694361 |
| C | -1.8296442 | -3.8196939 | -0.2698066 |
| C | -2.2197321 | -3.2509727 | 0.9824704  |
| C | -3.2569381 | -2.2171726 | 0.9835486  |
| C | -2.3300288 | -1.3183665 | 3.0988384  |
| C | -3.3045120 | -1.2282277 | 2.0567557  |
| C | -3.8352436 | 0.0705421  | 1.8302892  |
| C | -0.0723998 | -3.8267871 | -1.8290930 |
| C | 1.2281436  | -3.2963985 | -2.0545258 |
| C | 1.3196800  | -2.3238700 | -3.0960850 |
| C | 2.3300288  | -1.3183665 | -3.0988384 |
| C | 3.3045120  | -1.2282277 | -2.0567557 |
| C | 3.8352436  | 0.0705421  | -1.8302892 |
| C | -0.4694161 | -4.2292834 | -0.5123119 |
| C | 2.2197321  | -3.2509727 | -0.9824704 |
| C | 3.2569381  | -2.2171726 | -0.9835486 |
| C | 0.4694161  | -4.2292834 | 0.5123119  |
| C | 1.8296442  | -3.8196939 | 0.2698066  |
| C | 0.0723998  | -3.8267871 | 1.8290930  |
| C | -1.3196800 | -2.3238700 | 3.0960850  |
| C | -1.2281436 | -3.2963985 | 2.0545258  |
| C | 1.8244408  | -0.1735744 | -3.8283560 |
| C | 3.2638773  | 1.2424108  | -2.4741300 |
| C | 2.1992102  | 1.1557858  | -3.4047607 |
| C | 3.3010629  | 2.3171563  | -1.5130880 |
| C | 2.3205848  | 3.2981233  | -1.5148697 |
| C | 4.2366809  | -0.4684087 | 0.5125470  |
| C | 4.2366809  | 0.4684087  | -0.5125470 |
| C | 3.8252477  | 1.8280773  | -0.2694361 |
| C | 3.8252477  | -1.8280773 | 0.2694361  |
| C | 0.5112961  | -0.5109509 | -4.3535173 |
| C | 1.2466437  | 3.2605818  | -2.4759816 |
| C | 1.1585393  | 2.1943040  | -3.4040934 |
| C | -0.1724453 | 1.8195939  | -3.8274004 |
| C | -0.5112961 | 0.5109509  | -4.3535173 |
| C | 0.4694161  | 4.2292834  | -0.5123119 |
| C | 0.0723998  | 3.8267871  | -1.8290930 |
| C | -1.2281436 | 3.2963985  | -2.0545258 |
| C | -1.3196800 | 2.3238700  | -3.0960850 |
| C | -0.4694161 | 4.2292834  | 0.5123119  |
| C | 1.8296442  | 3.8196939  | -0.2698066 |
| C | 2.2197321  | 3.2509727  | 0.9824704  |
| C | 3.2569381  | 2.2171726  | 0.9835486  |
| C | -3.2638773 | -1.2424108 | -2.4741300 |
| C | -2.1992102 | -1.1557858 | -3.4047607 |
| C | -1.8244408 | 0.1735744  | -3.8283560 |
| C | -2.3300288 | 1.3183665  | -3.0988384 |
| C | -3.3045120 | 1.2282277  | -2.0567557 |
| C | -3.8352436 | -0.0705421 | -1.8302892 |
| C | -4.2366809 | 0.4684087  | 0.5125470  |

|    |            |            |            |
|----|------------|------------|------------|
| C  | -4.2366809 | -0.4684087 | -0.5125470 |
| C  | -1.8296442 | 3.8196939  | 0.2698066  |
| C  | -2.2197321 | 3.2509727  | -0.9824704 |
| C  | -3.2569381 | 2.2171726  | -0.9835486 |
| C  | -3.8252477 | 1.8280773  | 0.2694361  |
| C  | -1.2466437 | 3.2605818  | 2.4759816  |
| C  | -2.3205848 | 3.2981233  | 1.5148697  |
| C  | -3.3010629 | 2.3171563  | 1.5130880  |
| C  | 0.1724453  | 1.8195939  | 3.8274004  |
| C  | -1.1585393 | 2.1943040  | 3.4040934  |
| C  | 3.8352436  | -0.0705421 | 1.8302892  |
| C  | 3.3045120  | 1.2282277  | 2.0567557  |
| C  | 2.3300288  | 1.3183665  | 3.0988384  |
| C  | 1.3196800  | 2.3238700  | 3.0960850  |
| C  | 1.2281436  | 3.2963985  | 2.0545258  |
| C  | -0.0723998 | 3.8267871  | 1.8290930  |
| C  | 2.3205848  | -3.2981233 | 1.5148697  |
| C  | 3.3010629  | -2.3171563 | 1.5130880  |
| C  | 2.1992102  | -1.1557858 | 3.4047607  |
| C  | 3.2638773  | -1.2424108 | 2.4741300  |
| C  | 1.8244408  | 0.1735744  | 3.8283560  |
| C  | -0.5112961 | -0.5109509 | 4.3535173  |
| C  | -0.1724453 | -1.8195939 | 3.8274004  |
| C  | 1.1585393  | -2.1943040 | 3.4040934  |
| C  | 1.2466437  | -3.2605818 | 2.4759816  |
| C  | 0.5112961  | 0.5109509  | 4.3535173  |
| C  | -3.2638773 | 1.2424108  | 2.4741300  |
| C  | -2.1992102 | 1.1557858  | 3.4047607  |
| C  | -1.8244408 | -0.1735744 | 3.8283560  |
| C  | 0.6369468  | 0.0000000  | 0.0000000  |
| C  | -0.6369468 | 0.0000000  | 0.0000000  |
| Sc | 0.0000000  | 0.0000000  | 2.2280544  |
| Sc | 0.0000000  | 0.0000000  | -2.2280544 |
